# Supplementary material for: Marimo machines: oscillators, biosensors and actuators
Source: J Biol Eng. 2019 Sep 3;13:72. doi: 10.1186/s13036-019-0200-5 (PMC6724321; doi:10.1186/s13036-019-0200-5)
Supplement: Supplementary file 5 — Processed data of the Marimo oscillator video. (XLSX 12 kb) [file 13036_2019_200_MOESM5_ESM.xlsx]

## Sheet: Marimo oscillator
Time (min) start zero	Illumination (mv) PAR sensor	PPFD	Left (high 1, low 0)	Right (high 1, low 0)
0	2.4469	12.2345	1	1
4	0.9316	4.658	1	0
39	0.8844	4.422	0	0
47	1.216	6.08	0	1
78	2.4445	12.2225	1	1
202	0.895	4.475	1	0
237	2.444	12.22	1	1
244	1.3657	6.8285	0	1
272	2.4427	12.2135	1	1
388	0.9012	4.506	1	0
427	0.639	3.195	0	0
454	1.253	6.265	0	1
481	2.437	12.185	1	1
578	1.405	7.025	0	1
609	2.4367	12.1835	1	1
717	1.0595	5.2975	0	1
725	0.6102	3.051	0	0
752	0.6946	3.473	0	1
787	2.4354	12.177	1	1
927	1.0252	5.126	1	0
942	0.6818	3.409	0	0
958	0.9154	4.577	0	1
985	2.4293	12.1465	1	1
1140	0.9212	4.606	1	0
1144	0.5746	2.873	0	0
1171	0.9693	4.8465	0	1
1198	2.424	12.12	1	1
1306	0.9259	4.6295	1	0
1314	0.4731	2.3655	0	0
1337	0.5402	2.701	0	1
1372	2.4214	12.107	1	1
1508	0.9298	4.649	1	0
1535	0.643	3.215	0	0
1547	1.3466	6.733	0	1
1570	2.417	12.085	1	1
1674	0.8315	4.1575	1	0
1709	0.7742	3.871	0	0
1721	1.304	6.52	0	1
1740	2.4096	12.048	1	1
1899	1.0331	5.1655	1	0
1903	0.6596	3.298	0	0
1930	1.2605	6.3025	0	1
1957	2.4042	12.021	1	1
